# Supplementary material for: Coupling Mechanism of Electromagnetic Field and Thermal Stress on Drosophila melanogaster
Source: PubMed Central journal article supplement (PMC5017647; doi:10.1371/journal.pone.0162675), 2016-09-09
Supplement: pone.0162675.s002.pdf [file pone.0162675.s002.pdf]

**S1 Table.**

**Primers used in qRT-PCR**

| Gene name    | Forward primer(5'-3')  | Reverse primer(3'-5') |
|--------------|------------------------|-----------------------|
| <i>HSP22</i> | TGGCTACAAACTCACCCCTGGA | CTGCTGCTGATTTTCCCTCC  |
| <i>HSP26</i> | CGACTCCATCTTGGTCGAGG   | TGTAGCCATCGGGAACCTTG  |
| <i>HSP70</i> | GAACTCACACACAATGCCTGC  | TCCGAGTCTGTGAAAGCCA   |
| <i>RP49</i>  | AGCATA CAGGCCCAAGATCG  | GTTGTCGATACCCTTGGGCT  |
