# Supplementary material for: Coupling Mechanism of Electromagnetic Field and Thermal Stress on Drosophila melanogaster
Source: PubMed Central journal article supplement (PMC5017647; doi:10.1371/journal.pone.0162675), 2016-09-09
Supplement: pone.0162675.s003.pdf [file pone.0162675.s003.pdf]

## S2 Table

### Between-subject effects on average lifespan, median lethal time, and maximum lifespan

Dependent variable: average lifespan, median lethal time, maximum lifespan

| Source            | Average lifespan |         | Median lethal time |         | Maximum lifespan |         |
|-------------------|------------------|---------|--------------------|---------|------------------|---------|
|                   | F-Value          | P-Value | F-Value            | P-Value | F-Value          | P-Value |
| Strain            | 0.58             | 0.46    | 0.47               | 0.50    | 9.91             | 0.00    |
| Gender            | 4.81             | 0.04    | 4.23               | 0.05    | 2.69             | 0.11    |
| ELF               | 23.21            | 0.00    | 18.20              | 0.00    | 39.79            | 0.00    |
| Strain*Gender     | 1.59             | 0.22    | 2.18               | 0.15    | 0.04             | 0.84    |
| Strain*ELF        | 1.88             | 0.18    | 1.87               | 0.18    | 6.79             | 0.02    |
| Gender * ELF      | 0.52             | 0.48    | 0.86               | 0.36    | 0.68             | 0.42    |
| Strain*Gender*ELF | 0.01             | 0.92    | 0.10               | 0.76    | 0.96             | 0.34    |
