# Supplementary material for: Coupling Mechanism of Electromagnetic Field and Thermal Stress on Drosophila melanogaster
Source: PubMed Central journal article supplement (PMC5017647; doi:10.1371/journal.pone.0162675), 2016-09-09
Supplement: pone.0162675.s004.pdf [file pone.0162675.s004.pdf]

### S3 Table

#### Between-subject effects on activity times

Dependent variable: Activity

| Source                    | Canton-s |         | w1118   |         |
|---------------------------|----------|---------|---------|---------|
|                           | F-Value  | P-Value | F-Value | P-Value |
| Gender                    | 59.170   | 0.000   | 6.947   | 0.012   |
| Temp                      | 28.124   | 0.000   | 0.785   | 0.381   |
| ELF                       | 0.124    | 0.727   | 11.518  | 0.002   |
| Time                      | 520.025  | 0.000   | 381.679 | 0.000   |
| Gender * Temp             | 57.548   | 0.000   | 33.978  | 0.000   |
| Gender * ELF              | 0.191    | 0.664   | 2.359   | 0.132   |
| Gender*Time               | 17.864   | 0.000   | 5.506   | 0.024   |
| Temp * ELF                | 0.024    | 0.878   | 0.000   | 0.995   |
| Temp *Time                | 18.643   | 0.000   | 11.621  | 0.002   |
| ELF *Time                 | 0.987    | 0.326   | 12.605  | 0.001   |
| Gender * Tempe * ELF      | 0.669    | 0.418   | 1.823   | 0.184   |
| Gender * Tempe * Time     | 15.070   | 0.000   | 18.381  | 0.000   |
| Gender * ELF * Time       | 0.176    | 0.677   | 1.412   | 0.242   |
| Temp * ELF * Time         | 0.090    | 0.766   | 0.522   | 0.474   |
| Gender * Tempe * ELF*Time | 0.272    | 0.605   | 1.300   | 0.261   |
