# Supplementary material for: Coupling Mechanism of Electromagnetic Field and Thermal Stress on Drosophila melanogaster
Source: PubMed Central journal article supplement (PMC5017647; doi:10.1371/journal.pone.0162675), 2016-09-09
Supplement: pone.0162675.s005.pdf [file pone.0162675.s005.pdf]

#### S4 Table

#### Between-subject effects on *HSP22*, *HSP26*, and *HPS70* transcript levels

Dependent variable: *HSP22*, *HSP26*, *HPS70*

| Source                   | HSP22   |         | HSP26   |         | HSP70   |         |
|--------------------------|---------|---------|---------|---------|---------|---------|
|                          | F-Value | P-Value | F-Value | P-Value | F-Value | P-Value |
| Strain                   | 3.738   | 0.056   | 8.308   | 0.005   | 1.408   | 0.238   |
| Gender                   | 0.147   | 0.702   | 16.016  | 0.000   | 0.385   | 0.536   |
| Temp                     | 99.082  | 0.000   | 163.493 | 0.000   | 40.798  | 0.000   |
| ELF                      | 7.112   | 0.009   | 2.044   | 0.156   | 9.199   | 0.003   |
| Strain*Gender            | 6.296   | 0.013   | 0.178   | 0.674   | 0.008   | 0.927   |
| Strain*Temp              | 3.928   | 0.050   | 7.569   | 0.007   | 1.469   | 0.228   |
| Strain*ELF               | 0.316   | 0.575   | 0.405   | 0.526   | 0.024   | 0.876   |
| Gender * Temp            | 0.181   | 0.671   | 16.085  | 0.000   | 0.392   | 0.533   |
| Gender * ELF             | 1.452   | 0.231   | 4.503   | 0.036   | 0.467   | 0.496   |
| Temp * ELF               | 6.581   | 0.012   | 3.203   | 0.076   | 11.392  | 0.001   |
| Strain*Gender * Temp     | 7.055   | 0.009   | 0.165   | 0.685   | 0.010   | 0.919   |
| Strain*Gender * ELF      | 0.409   | 0.524   | 0.993   | 0.321   | 1.356   | 0.247   |
| Strain*Temp * ELF        | 0.367   | 0.546   | 0.601   | 0.440   | 0.035   | 0.852   |
| Gender*Temp * ELF        | 1.556   | 0.215   | 4.568   | 0.035   | 0.470   | 0.495   |
| Strain*Gender*Temp * ELF | 0.243   | 0.623   | 1.051   | 0.307   | 1.358   | 0.246   |
