# Supplementary material for: Coupling Mechanism of Electromagnetic Field and Thermal Stress on Drosophila melanogaster
Source: PubMed Central journal article supplement (PMC5017647; doi:10.1371/journal.pone.0162675), 2016-09-09
Supplement: pone.0162675.s006.pdf [file pone.0162675.s006.pdf]

## S5 Table

### Between-subject effects on ROS, MDA, TAC, SOD, CAT

Dependent variable: ROS, MDA, TAC, SOD, CAT

| Source                   | ROS     |         | MDA     |         | TAC     |         | SOD     |         | CAT     |         |
|--------------------------|---------|---------|---------|---------|---------|---------|---------|---------|---------|---------|
|                          | F-Value | P-Value | F-Value | P-Value | F-Value | P-Value | F-Value | P-Value | F-Value | P-Value |
| Strain                   | 10.159  | 0.002   | 22.302  | 0.000   | 1.165   | 0.282   | 118.001 | 0.000   | 11.498  | 0.001   |
| Gender                   | 0.207   | 0.650   | 1.296   | 0.257   | 87.411  | 0.000   | 74.426  | 0.000   | 9.329   | 0.003   |
| Temp                     | 19.966  | 0.000   | 24.891  | 0.000   | 0.055   | 0.814   | 48.572  | 0.000   | 0.465   | 0.497   |
| ELF                      | 3.307   | 0.071   | 4.792   | 0.030   | 5.194   | 0.024   | 0.293   | 0.589   | 3.731   | 0.056   |
| Strain*Gender            | 7.632   | 0.007   | 3.226   | 0.074   | 55.753  | 0.000   | 0.715   | 0.399   | 2.608   | 0.109   |
| Strain*Temp              | 0.881   | 0.350   | 5.716   | 0.018   | 1.902   | 0.170   | 3.665   | 0.058   | 3.330   | 0.070   |
| Strain*ELF               | 0.424   | 0.516   | 0.398   | 0.529   | 0.058   | 0.810   | 1.038   | 0.310   | 1.648   | 0.202   |
| Gender * Temp            | 0.698   | 0.405   | 0.254   | 0.615   | 11.030  | 0.001   | 3.137   | 0.079   | 4.717   | 0.032   |
| Gender * ELF             | 0.356   | 0.552   | 0.013   | 0.909   | 4.214   | 0.042   | 3.412   | 0.067   | 1.230   | 0.270   |
| Temp * ELF               | 0.293   | 0.589   | 6.145   | 0.014   | 0.473   | 0.493   | 2.162   | 0.144   | 0.550   | 0.460   |
| Strain*Gender * Temp     | 9.031   | 0.003   | 1.328   | 0.251   | 0.010   | 0.922   | 1.933   | 0.167   | 0.935   | 0.335   |
| Strain*Gender * ELF      | 1.745   | 0.189   | 0.001   | 0.977   | 0.290   | 0.591   | 4.075   | 0.046   | 3.039   | 0.084   |
| Strain*Temp * ELF        | 0.251   | 0.617   | 0.269   | 0.605   | 0.768   | 0.382   | 1.714   | 0.193   | 0.005   | 0.946   |
| Gender*Temp * ELF        | 1.579   | 0.211   | 3.066   | 0.082   | 0.258   | 0.613   | 1.877   | 0.173   | 0.000   | 0.985   |
| Strain*Gender*Temp * ELF | 0.017   | 0.896   | 0.763   | 0.384   | 3.189   | 0.077   | 0.591   | 0.443   | 1.534   | 0.218   |
